# Supplementary material for: Effects of OH radical and SO 2 concentrations on photochemical reactions of mixed anthropogenic organic gases
Source: Copernicus journal article supplement (doi:10.5194/acp-2022-294), 2022-04-25
Supplement: Supplementary file 1 [file acp-2022-294-supplement-version3.pdf]

*Supporting of*

***Effects of OH radical and SO<sub>2</sub> concentrations on photochemical reactions of mixed anthropogenic organic gases***

Junling Li et al.

5 *Correspondence to Hong Li (lihong@craes.org.cn), Maofa Ge (gemaofa@iccas.ac.cn)*

10 **Offline measurement: ESI-Q-ToF-MS**

The extracted solutions were analyzed with electrospray ionization quadrupole time-of flight mass spectrometry (ESI-Q-ToF-MS, Bruker Compact). Positive ion mode was used for the ESI-Q-ToF-MS. In general, the theoretical molecular mass of a compound refers to the monoisotopic mass of the compound, which is the sum of the masses of its constituent elements, with each element mass choosing the mass of its most abundant isotope. The expected elemental formula means the formula with the theoretical molecular mass. The molecular mass of measured elemental formula is usually not the sum of masses of the most abundant isotopes of each element. Thus, mass accuracy (ppm) is applied to indicate the difference degree between the measured and the theoretical molecular mass of the elemental formula. The mass resolution of this used instrument is >20000.

20

25

**Table S1. Initial conditions and general results of the NO experiments conducted in this work.**

| Number     | Date      | Initial conditions |                  |                       |          |                       |                       |          |                                                         |                     | General Results                   |                                             |                                                    |
|------------|-----------|--------------------|------------------|-----------------------|----------|-----------------------|-----------------------|----------|---------------------------------------------------------|---------------------|-----------------------------------|---------------------------------------------|----------------------------------------------------|
|            |           | 1,3,5-TMB (ppb)    | n-dodecane (ppb) | SO <sub>2</sub> (ppb) | NO (ppb) | NO <sub>2</sub> (ppb) | NO <sub>x</sub> (ppb) | ppbC/ppb | J(NO <sub>2</sub> ) ( $\times 10^{-3} \text{ s}^{-1}$ ) | T (°C) <sup>a</sup> | O <sub>3</sub> (ppb) <sup>b</sup> | M <sup>c</sup> ( $\mu\text{g}/\text{m}^3$ ) | Mo corr. ( $\mu\text{g}/\text{m}^3$ ) <sup>d</sup> |
| L-NO-Mix-1 | 2020.1110 | 177.8              | 29.2             | 6.6                   | 212      | 13                    | 225                   | 8.67     | 3.7                                                     | 29                  | 267                               | 8.4                                         | 27.5                                               |
| L-NO-Mix-2 | 2020.1227 | 192.4              | 26.4             | 8.1                   | 336      | 18                    | 354                   | 5.79     | 2.3                                                     | 20                  | 71                                | 14.2                                        | 58.8                                               |
| H-NO-Mix-1 | 2020.1231 | 185.8              | 25.7             | 25.5                  | 335      | 20                    | 355                   | 5.58     | 3.2                                                     | 18                  | 138                               | 59                                          | 70.3                                               |
| H-NO-Mix-2 | 2020.1214 | 176.6              | 23.2             | 33                    | 323      | 24                    | 347                   | 5.38     | 2.9                                                     | 15                  | 97                                | 60.6                                        | 72.4                                               |
| H-NO-Mix-3 | 2020.1113 | 188.4              | 29.9             | 105                   | 228      | 14                    | 242                   | 8.49     | 3.1                                                     | 28                  | 252                               | 169                                         | 185.3                                              |
| L-NO-TMB-1 | 2020.1225 | 190.2              | --               | 9.4                   | 326      | 22                    | 348                   | 4.92     | 2.6                                                     | 23                  | 123                               | 6                                           | 24.7                                               |
| L-NO-TMB-2 | 2021.0102 | 191.7              | --               | 9.5                   | 321      | 23                    | 344                   | 5.02     | 2.1                                                     | 15                  | 81                                | 16.7                                        | 31.7                                               |
| H-NO-TMB-1 | 2020.1216 | 182.8              | --               | 32                    | 314      | 33                    | 347                   | 4.74     | 3.2                                                     | 20                  | 186                               | 39.8                                        | 49.1                                               |
| H-NO-TMB-2 | 2021.0105 | 190.1              | --               | 35                    | 313      | 45                    | 358                   | 4.78     | 2.9                                                     | 16                  | 100                               | 52.4                                        | 63.3                                               |
| L-NO-Dod-1 | 2020.1221 | --                 | 22.9             | 6.1                   | 309      | 29                    | 338                   | 0.81     | 2.5                                                     | 21                  | 1                                 | 6.2                                         | 21.1                                               |
| L-NO-Dod-2 | 2021.0117 | --                 | 29.8             | 6.4                   | 333      | 25                    | 358                   | 1.00     | 2.8                                                     | 19                  | 0.9                               | 11.6                                        | 27.2                                               |
| H-NO-Dod-1 | 2020.1219 | --                 | 27.3             | 33                    | 310      | 27                    | 337                   | 0.97     | 2.5                                                     | 19                  | 1.2                               | 8.1                                         | 19.9                                               |
| H-NO-Dod-2 | 2021.0112 | --                 | 23               | 71                    | 355      | 38                    | 393                   | 0.70     | 2.4                                                     | 18                  | 1.2                               | 5.2                                         | 22.1                                               |

a: the temperature here is the value at noon; b: the ozone concentration here is the highest value of the reaction process; c: M here is the mass concentration of formed secondary aerosol; d: the mass concentration here is corrected after taking both vapor and particle wall loss into account.

30

**Table S2. Initial conditions and general results of the HONO experiments conducted in this work.**

| Number       | Date      | Initial conditions |                  |                       |          |                       |                       |          |                                                         |                     | General Results                   |                                             |                                                    |
|--------------|-----------|--------------------|------------------|-----------------------|----------|-----------------------|-----------------------|----------|---------------------------------------------------------|---------------------|-----------------------------------|---------------------------------------------|----------------------------------------------------|
|              |           | 1,3,5-TMB (ppb)    | n-dodecane (ppb) | SO <sub>2</sub> (ppb) | NO (ppb) | NO <sub>2</sub> (ppb) | NO <sub>x</sub> (ppb) | ppbC/ppb | J(NO <sub>2</sub> ) ( $\times 10^{-3} \text{ s}^{-1}$ ) | T (°C) <sup>a</sup> | O <sub>3</sub> (ppb) <sup>b</sup> | M <sup>c</sup> ( $\mu\text{g}/\text{m}^3$ ) | Mo corr. ( $\mu\text{g}/\text{m}^3$ ) <sup>c</sup> |
| L-HONO-Mix-1 | 2020.1127 | 137.9              | 23.9             | 4                     | 106      | 298                   | 404                   | 3.78     | 3.4                                                     | 21                  | 243                               | 20.3                                        | 23.1                                               |
| L-HONO-Mix-2 | 2020.1208 | 185.9              | 23.2             | 5                     | 108      | 261                   | 369                   | 5.29     | 3.1                                                     | 19                  | 231                               | 35.7                                        | 47.6                                               |
| H-HONO-Mix-1 | 2020.1120 | 193.1              | 27.1             | 23.6                  | 159      | 286                   | 445                   | 4.64     | 3.9                                                     | 27                  | 317                               | 304.5                                       | 328.3                                              |
| H-HONO-Mix-2 | 2020.1123 | 159.4              | 23.2             | 30                    | 96       | 264                   | 360                   | 4.76     | 3.6                                                     | 24                  | 260                               | 368.6                                       | 395.8                                              |
| H-HONO-Mix-3 | 2021.0622 | 165.9              | 28.9             | 35                    | 43       | 272                   | 315                   | 5.84     | 4.3                                                     | 41                  | 645                               | 340.9                                       | 364.8                                              |
| H-HONO-Mix-4 | 2021.0120 | 191.4              | 26.2             | 65                    | 130      | 250                   | 380                   | 5.36     | 1.9                                                     | 16                  | 184                               | 534.4                                       | 569.4                                              |
| L-HONO-TMB-1 | 2020.1210 | 196                | --               | 3.6                   | 117      | 296                   | 413                   | 4.27     | 2.5                                                     | 22                  | 231                               | 12.3                                        | 35.2                                               |
| L-HONO-TMB-2 | 2021.0124 | 216.9              | --               | 0                     | 105      | 236                   | 341                   | 5.72     | 1.2                                                     | 15                  | 148                               | 30.5                                        | 40.9                                               |
| H-HONO-TMB-1 | 2020.1125 | 179.1              | --               | 28                    | 85       | 265                   | 350                   | 4.61     | 3.4                                                     | 24                  | 212                               | 240.1                                       | 261.4                                              |

|              |           |       |      |    |     |     |     |      |     |    |     |       |       |
|--------------|-----------|-------|------|----|-----|-----|-----|------|-----|----|-----|-------|-------|
| H-HONO-TMB-2 | 2021.0126 | 157.4 | --   | 31 | 113 | 230 | 343 | 4.13 | 3.2 | 24 | 225 | 176.7 | 194.9 |
| L-HONO-Dod-1 | 2021.0131 | --    | 24.4 | 3  | 116 | 227 | 343 | 0.85 | 2.2 | 16 | 5   | 19    | 29.6  |
| H-HONO-Dod-1 | 2021.0129 | --    | 24.9 | 27 | 104 | 235 | 339 | 0.88 | 3.2 | 19 | 7   | 173.8 | 189.5 |
| H-HONO-Dod-2 | 2020.1203 | --    | 24.7 | 35 | 116 | 313 | 429 | 0.69 | 3.4 | 21 | 5   | 123.5 | 137.2 |

35 a: the temperature here is the value at noon; b: the ozone concentration here is the highest value of the reaction process; c: M here is the mass concentration of formed secondary aerosol; d: the mass concentration here is corrected after taking both vapor and particle wall loss into account.

**Table S3. List of functional groups in SOA extracts.**

| Functional groups                                                     | Wavenumber (cm <sup>-1</sup> ) |
|-----------------------------------------------------------------------|--------------------------------|
| C-OH in alcohol                                                       | 3360                           |
| O-H stretching vibration of hydroxyl and carboxyl groups              | 3100-3300 (3192)               |
| C-H stretching vibration in aromatics                                 | 3000-3200                      |
| CH <sub>3</sub> stretching vibration in alkanes                       | 2960                           |
| CH <sub>2</sub> stretching vibration in alkanes                       | 2921, 2850                     |
| C=O stretching vibrations of ketones, aldehydes, and carboxylic acids | 1660, 1633                     |
| deformation vibrations of methyl and methylene groups                 | 1465, 1415                     |
| -ONO <sub>2</sub> stretching in nitrate ester                         | 1268                           |
| the absorption peak of sulfate                                        | 1000-1200                      |
| sulfate group in sulfate and organic compounds                        | 1100                           |
| absorption band of S=O in organic compound                            | 1040-1070                      |

40 **Table S4. Identified mass spectral peaks, molecular formulas, molecular weights, and accuracy of mixed experiments-derived SOA.**

| Molecular formula                               | M+H | M+Na | M-H       | H-HONO-MIX | L-HONO-MIX | H-NO-MIX | L-NO-MIX | Accuracy (ppm) | RDB <sup>a</sup> |
|-------------------------------------------------|-----|------|-----------|------------|------------|----------|----------|----------------|------------------|
| C <sub>4</sub> H <sub>10</sub> O <sub>3</sub>   |     |      | 105.0549  | ✓          |            |          |          | -2.56          | 0                |
| C <sub>5</sub> H <sub>6</sub> O <sub>3</sub>    |     |      | 113.02286 | ✓          |            |          |          | -8.93          | 3                |
| C <sub>7</sub> H <sub>6</sub> O <sub>2</sub>    |     |      | 121.0283  | ✓          | ✓          |          |          | -5.41          | 5                |
| C <sub>5</sub> H <sub>8</sub> O <sub>4</sub>    |     |      | 131.03438 |            | ✓          |          |          | -0.41          | 2                |
| C <sub>9</sub> H <sub>12</sub> O <sub>2</sub>   |     |      | 135.08076 | ✓          |            | ✓        | ✓        | -1.70          | 4                |
| C <sub>4</sub> H <sub>10</sub> O <sub>3</sub> S |     |      | 137.02873 |            |            |          | ✓        | 9.98           | 0                |
| C <sub>7</sub> H <sub>12</sub> O <sub>3</sub>   |     |      | 143.07068 |            | ✓          |          |          | -0.97          | 2                |
| C <sub>8</sub> H <sub>16</sub> O <sub>2</sub>   |     |      | 143.10798 | ✓          |            |          |          | 5.42           | 1                |

|                                                  |           |           |           |   |   |   |   |       |   |
|--------------------------------------------------|-----------|-----------|-----------|---|---|---|---|-------|---|
| C <sub>6</sub> H <sub>10</sub> O <sub>4</sub>    |           |           | 145.05036 |   | ✓ |   |   | 1.90  | 2 |
| C <sub>5</sub> H <sub>8</sub> O <sub>3</sub> S   |           |           | 147.01289 |   |   | ✓ |   | 8.84  | 2 |
| C <sub>4</sub> H <sub>6</sub> O <sub>6</sub>     |           |           | 149.00867 | ✓ |   |   |   | 0.38  | 2 |
| C <sub>5</sub> H <sub>10</sub> O <sub>3</sub> S  |           |           | 149.02814 |   | ✓ |   |   | 6.04  | 1 |
| C <sub>9</sub> H <sub>18</sub> O <sub>2</sub>    |           |           | 157.12184 | ✓ |   |   |   | -6.46 | 1 |
| C <sub>6</sub> H <sub>8</sub> O <sub>3</sub> S   |           |           | 159.01119 | ✓ | ✓ |   |   | -2.52 | 3 |
| C <sub>7</sub> H <sub>6</sub> O <sub>3</sub>     |           | 161.02144 |           |   |   | ✓ | ✓ | -0.14 | 5 |
| C <sub>5</sub> H <sub>10</sub> O <sub>6</sub>    |           |           | 165.03948 | ✓ | ✓ |   | ✓ | -2.62 | 1 |
| C <sub>6</sub> H <sub>12</sub> O <sub>6</sub>    |           |           | 179.05436 | ✓ | ✓ | ✓ | ✓ | -6.72 | 1 |
| C <sub>5</sub> H <sub>10</sub> O <sub>7</sub>    |           |           | 181.03567 |   |   |   | ✓ | 0.84  | 1 |
| C <sub>5</sub> H <sub>8</sub> O <sub>7</sub>     | 181.0352  |           |           | ✓ | ✓ | ✓ | ✓ | 2.06  | 2 |
| C <sub>12</sub> H <sub>22</sub> O                | 183.17437 |           |           | ✓ | ✓ | ✓ | ✓ | -2.84 | 2 |
| C <sub>7</sub> H <sub>8</sub> O <sub>4</sub> S   |           |           | 187.00505 |   |   | ✓ |   | -7.78 | 4 |
| C <sub>6</sub> H <sub>12</sub> O <sub>7</sub>    |           |           | 195.05121 |   |   |   | ✓ | 3.75  | 1 |
| C <sub>8</sub> H <sub>7</sub> NO <sub>5</sub>    |           |           | 196.02295 | ✓ | ✓ | ✓ | ✓ | -8.40 | 6 |
| C <sub>7</sub> H <sub>10</sub> O <sub>5</sub> S  |           |           | 205.01678 |   | ✓ | ✓ |   | -1.41 | 3 |
| C <sub>9</sub> H <sub>14</sub> O <sub>4</sub>    |           | 209.08031 |           |   | ✓ |   |   | 6.37  | 3 |
| C <sub>14</sub> H <sub>20</sub> O <sub>2</sub>   | 221.15394 |           |           | ✓ | ✓ |   | ✓ | -0.97 | 5 |
| C <sub>7</sub> H <sub>12</sub> O <sub>6</sub> S  |           |           | 223.02585 |   | ✓ |   | ✓ | -8.00 | 2 |
| C <sub>7</sub> H <sub>10</sub> O <sub>8</sub>    | 223.04424 |           |           |   | ✓ |   |   | -5.17 | 3 |
| C <sub>14</sub> H <sub>24</sub> O <sub>2</sub>   | 225.1834  |           |           |   | ✓ |   |   | -9.13 | 3 |
| C <sub>14</sub> H <sub>28</sub> O <sub>2</sub>   |           |           | 227.20095 | ✓ | ✓ |   | ✓ | -0.68 | 1 |
| C <sub>10</sub> H <sub>16</sub> O <sub>6</sub>   | 233.10277 |           |           |   | ✓ |   |   | 1.10  | 3 |
| C <sub>12</sub> H <sub>26</sub> O <sub>4</sub>   |           |           | 233.07539 |   | ✓ | ✓ | ✓ | 0.45  | 0 |
| C <sub>13</sub> H <sub>24</sub> O <sub>2</sub>   |           | 235.16615 |           |   | ✓ |   |   | -5.31 | 2 |
| C <sub>11</sub> H <sub>12</sub> O <sub>6</sub>   |           |           | 239.05639 | ✓ | ✓ |   | ✓ | 3.46  | 6 |
| C <sub>8</sub> H <sub>10</sub> O <sub>7</sub>    |           | 241.03098 |           |   |   |   | ✓ | -5.98 | 4 |
| C <sub>12</sub> H <sub>14</sub> O <sub>6</sub>   |           |           | 253.07162 | ✓ | ✓ |   | ✓ | 1.61  | 6 |
| C <sub>15</sub> H <sub>31</sub> NO <sub>2</sub>  |           |           | 256.22589 | ✓ | ✓ | ✓ |   | -6.89 | 1 |
| C <sub>6</sub> H <sub>12</sub> O <sub>11</sub>   | 261.04745 |           |           |   |   |   | ✓ | 6.37  | 1 |
| C <sub>15</sub> H <sub>22</sub> O <sub>4</sub>   | 267.16029 |           |           | ✓ | ✓ | ✓ |   | 2.45  | 5 |
| C <sub>17</sub> H <sub>34</sub> O <sub>2</sub>   |           |           | 269.24882 | ✓ |   |   |   | 2.84  | 1 |
| C <sub>12</sub> H <sub>14</sub> O <sub>7</sub>   | 271.0823  |           |           | ✓ |   | ✓ |   | 1.93  | 6 |
| C <sub>14</sub> H <sub>12</sub> O <sub>6</sub>   | 277.07058 |           |           |   |   | ✓ |   | -2.29 | 9 |
| C <sub>14</sub> H <sub>21</sub> NO <sub>5</sub>  | 282.13525 |           |           | ✓ | ✓ |   |   | 3.91  | 6 |
| C <sub>14</sub> H <sub>23</sub> NO <sub>5</sub>  | 284.15113 |           |           | ✓ | ✓ |   |   | 4.69  | 5 |
| C <sub>17</sub> H <sub>35</sub> NO <sub>2</sub>  |           |           | 284.26063 | ✓ |   | ✓ |   | 5.89  | 1 |
| C <sub>14</sub> H <sub>25</sub> NO <sub>5</sub>  | 286.15679 |           |           | ✓ | ✓ | ✓ |   | 1.58  | 4 |
| C <sub>12</sub> H <sub>10</sub> O <sub>7</sub>   |           | 289.03457 |           |   | ✓ |   |   | 7.43  | 8 |
| C <sub>17</sub> H <sub>34</sub> O <sub>2</sub>   |           | 293.24635 |           | ✓ | ✓ |   |   | 2.39  | 1 |
| C <sub>14</sub> H <sub>30</sub> O <sub>4</sub> S |           |           | 293.1798  | ✓ | ✓ | ✓ | ✓ | 3.90  | 0 |
| C <sub>19</sub> H <sub>38</sub> O <sub>2</sub>   |           |           | 297.27787 | ✓ | ✓ |   |   | -5.00 | 1 |
| C <sub>14</sub> H <sub>21</sub> NO <sub>6</sub>  | 298.13009 |           |           | ✓ | ✓ | ✓ |   | 3.45  | 6 |
| C <sub>18</sub> H <sub>36</sub> O <sub>3</sub>   |           |           | 299.25831 | ✓ |   |   |   | -1.04 | 1 |
| C <sub>17</sub> H <sub>34</sub> O <sub>4</sub>   |           |           | 301.23624 | ✓ | ✓ |   |   | -1.00 | 1 |
| C <sub>18</sub> H <sub>28</sub> O <sub>4</sub>   | 309.20768 |           |           | ✓ |   | ✓ | ✓ | 3.54  | 5 |
| C <sub>17</sub> H <sub>28</sub> O <sub>3</sub> S |           |           | 311.16817 | ✓ | ✓ | ✓ | ✓ | 0.25  | 4 |
| C <sub>20</sub> H <sub>24</sub> O <sub>3</sub>   | 313.18112 |           |           | ✓ |   |   | ✓ | 2.40  | 9 |
| C <sub>10</sub> H <sub>18</sub> O <sub>11</sub>  |           |           | 313.07845 | ✓ | ✓ |   | ✓ | 4.36  | 2 |
| C <sub>12</sub> H <sub>22</sub> O <sub>8</sub>   |           | 317.12123 |           | ✓ |   |   | ✓ | -0.02 | 2 |

|                                                   |           |           |           |   |   |   |   |       |    |
|---------------------------------------------------|-----------|-----------|-----------|---|---|---|---|-------|----|
| C <sub>11</sub> H <sub>10</sub> O <sub>11</sub>   |           |           | 317.01445 |   |   | ✓ |   | -0.11 | 7  |
| C <sub>19</sub> H <sub>28</sub> O <sub>2</sub>    |           | 321.27759 |           | ✓ | ✓ |   |   | 1.99  | 1  |
| C <sub>19</sub> H <sub>32</sub> O <sub>4</sub>    |           |           | 323.22062 |   |   |   | ✓ | -4.99 | 4  |
| C <sub>21</sub> H <sub>26</sub> O <sub>3</sub>    |           |           | 325.18201 | ✓ | ✓ | ✓ | ✓ | 5.04  | 9  |
| C <sub>19</sub> H <sub>38</sub> O <sub>4</sub>    |           |           | 329.26913 | ✓ | ✓ | ✓ | ✓ | -0.17 | 1  |
| C <sub>17</sub> H <sub>24</sub> O <sub>5</sub>    |           | 331.15274 |           | ✓ |   |   | ✓ | 1.80  | 6  |
| C <sub>17</sub> H <sub>28</sub> O <sub>5</sub>    |           | 335.18129 |           | ✓ | ✓ |   |   | -6.42 | 4  |
| C <sub>15</sub> H <sub>24</sub> O <sub>7</sub>    |           | 339.14059 |           |   |   |   | ✓ | -4.08 | 4  |
| C <sub>19</sub> H <sub>32</sub> O <sub>3</sub> S  |           |           | 339.20067 | ✓ | ✓ | ✓ | ✓ | 3.77  | 4  |
| C <sub>21</sub> H <sub>42</sub> O <sub>3</sub>    |           |           | 341.30626 | ✓ |   |   |   | 0.69  | 1  |
| C <sub>21</sub> H <sub>42</sub> O <sub>2</sub>    |           | 349.30879 |           |   | ✓ |   |   | 1.55  | 1  |
| C <sub>21</sub> H <sub>36</sub> O <sub>4</sub>    |           |           | 351.2518  |   |   |   | ✓ | -4.94 | 4  |
| C <sub>23</sub> H <sub>30</sub> O <sub>3</sub>    |           |           | 353.21004 | ✓ |   |   | ✓ | -4.61 | 9  |
| C <sub>18</sub> H <sub>32</sub> O <sub>6</sub> S  |           |           | 375.18653 | ✓ | ✓ |   |   | 2.40  | 3  |
| C <sub>25</sub> H <sub>34</sub> O <sub>3</sub>    |           |           | 381.24039 | ✓ |   |   | ✓ | -2.58 | 9  |
| C <sub>21</sub> H <sub>42</sub> O <sub>4</sub>    |           | 381.29843 |           |   |   | ✓ |   | 0.92  | 1  |
| C <sub>12</sub> H <sub>18</sub> O <sub>14</sub>   |           |           | 385.06093 |   |   | ✓ |   | -2.37 | 4  |
| C <sub>20</sub> H <sub>20</sub> O <sub>8</sub>    |           |           | 387.10571 | ✓ |   |   |   | -5.90 | 11 |
| C <sub>10</sub> H <sub>16</sub> O <sub>14</sub> S |           |           | 391.0178  |   |   | ✓ |   | -1.15 | 3  |
| C <sub>24</sub> H <sub>35</sub> NO <sub>4</sub>   | 402.26369 |           |           | ✓ | ✓ |   |   | -1.85 | 8  |
| C <sub>20</sub> H <sub>36</sub> O <sub>6</sub> S  |           |           | 403.21776 | ✓ | ✓ |   | ✓ | 2.32  | 3  |
| C <sub>23</sub> H <sub>28</sub> O <sub>3</sub> S  |           |           | 407.16857 |   |   | ✓ |   | 1.18  | 12 |
| C <sub>25</sub> H <sub>42</sub> O <sub>3</sub> S  |           |           | 421.27961 | ✓ |   |   |   | 4.67  | 5  |
| C <sub>24</sub> H <sub>40</sub> O <sub>6</sub>    | 425.29015 |           |           |   | ✓ |   |   | -0.39 | 5  |
| C <sub>16</sub> H <sub>20</sub> O <sub>14</sub> S |           |           | 467.05113 |   | ✓ |   |   | 3.38  | 7  |
| C <sub>26</sub> H <sub>44</sub> O <sub>7</sub>    | 469.31634 |           |           |   | ✓ |   |   | -0.40 | 5  |
| C <sub>30</sub> H <sub>60</sub> O <sub>4</sub>    |           |           | 483.4415  | ✓ |   |   |   | 0.34  | 1  |
| C <sub>24</sub> H <sub>36</sub> O <sub>10</sub>   | 485.23785 |           |           | ✓ |   |   |   | -1.69 | 7  |
| C <sub>27</sub> H <sub>50</sub> O <sub>6</sub>    |           | 493.35116 |           | ✓ |   |   |   | 1.32  | 3  |
| C <sub>32</sub> H <sub>64</sub> O <sub>4</sub>    |           |           | 511.47436 |   | ✓ |   | ✓ | 3.37  | 1  |
| C <sub>26</sub> H <sub>41</sub> NO <sub>9</sub>   | 512.28878 |           |           | ✓ |   |   |   | 5.51  | 7  |
| C <sub>23</sub> H <sub>22</sub> O <sub>12</sub> S |           |           | 521.07702 |   |   | ✓ |   | 3.16  | 13 |
| C <sub>34</sub> H <sub>62</sub> O <sub>4</sub>    |           |           | 533.45851 | ✓ |   |   | ✓ | 2.86  | 4  |
| C <sub>34</sub> H <sub>66</sub> O <sub>4</sub>    |           |           | 537.48731 | ✓ |   |   |   | -1.82 | 2  |
| C <sub>34</sub> H <sub>68</sub> O <sub>4</sub>    |           |           | 539.50358 |   |   |   | ✓ | -0.66 | 1  |
| C <sub>33</sub> H <sub>67</sub> NO <sub>4</sub>   |           |           | 540.49708 |   | ✓ |   |   | 1.07  | 2  |
| C <sub>34</sub> H <sub>44</sub> O <sub>8</sub>    | 545.31236 |           |           | ✓ |   |   |   | 1.68  | 10 |
| C <sub>29</sub> H <sub>44</sub> O <sub>0</sub>    |           | 559.28929 |           | ✓ |   |   |   | 1.77  | 8  |
| C <sub>36</sub> H <sub>72</sub> O <sub>4</sub>    |           |           | 567.5355  |   | ✓ |   |   | -0.41 | 1  |
| C <sub>36</sub> H <sub>74</sub> O <sub>4</sub>    |           |           | 569.55075 | ✓ |   |   |   | -0.24 | 0  |
| C <sub>37</sub> H <sub>74</sub> O <sub>6</sub>    |           |           | 613.53995 |   |   |   | ✓ | -1.25 | 1  |

a: RDB is the abbreviation of ring and double-bond equivalent.

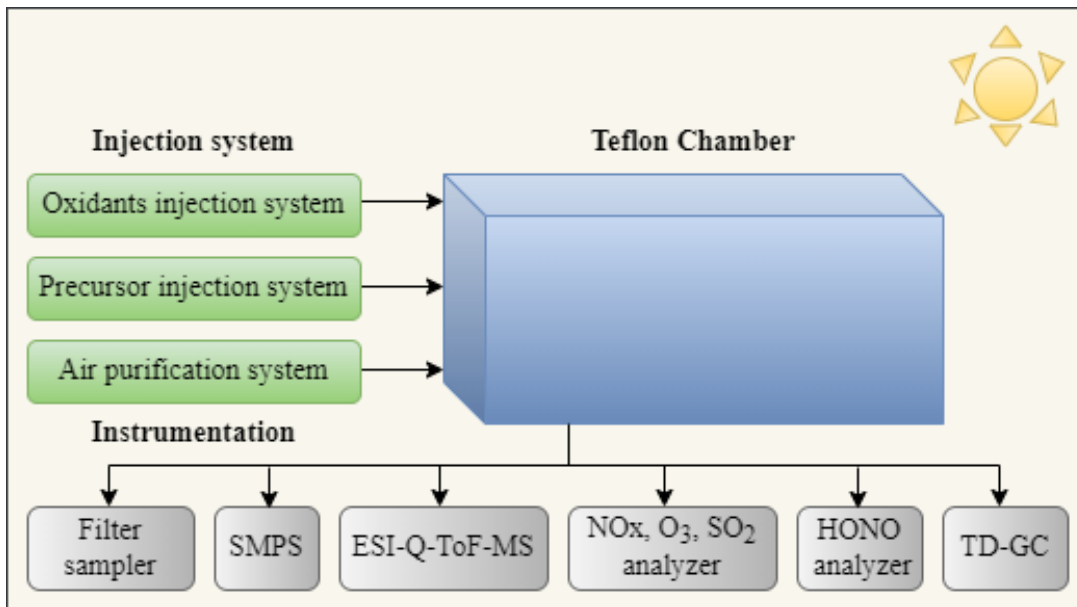

Figure S1. Schematic of the CRAES smog chamber.

50

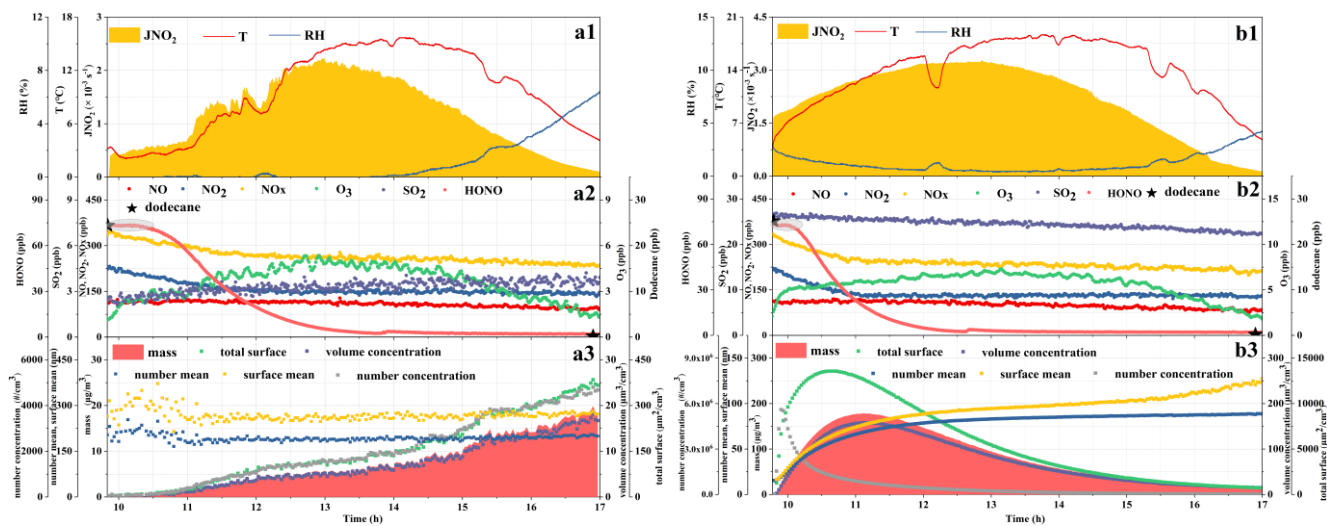

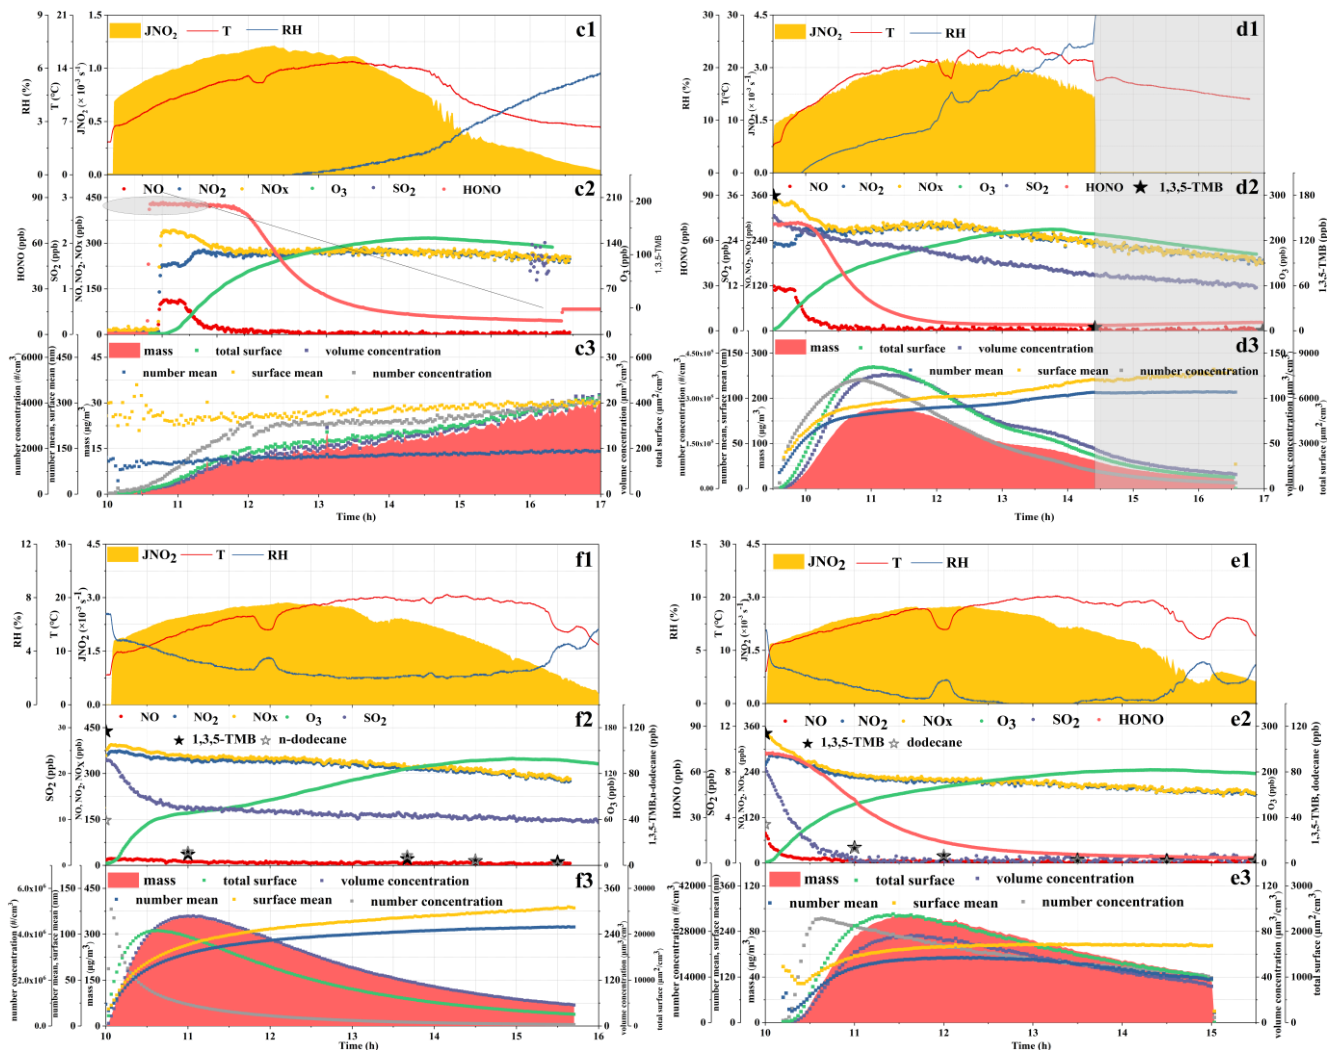

55 **Figure S2.** Reaction profiles of the HONO experiments: (a) n-dodecane + HONO + low concentration SO<sub>2</sub> (L-HONO-Dod); (b) n-dodecane + HONO + high concentration SO<sub>2</sub> (H-HONO-Dod); (c) 1,3,5-trimethylbenzene + HONO + low concentration SO<sub>2</sub> (L-HONO-TMB); (d) 1,3,5-trimethylbenzene + HONO + high concentration SO<sub>2</sub> (H-HONO-TMB); (e) n-dodecane + 1,3,5-trimethylbenzene + HONO + low concentration SO<sub>2</sub> (L-HONO-Mix); (f) n-dodecane + 1,3,5-trimethylbenzene + HONO + high concentration SO<sub>2</sub> (H-HONO-Mix).

60

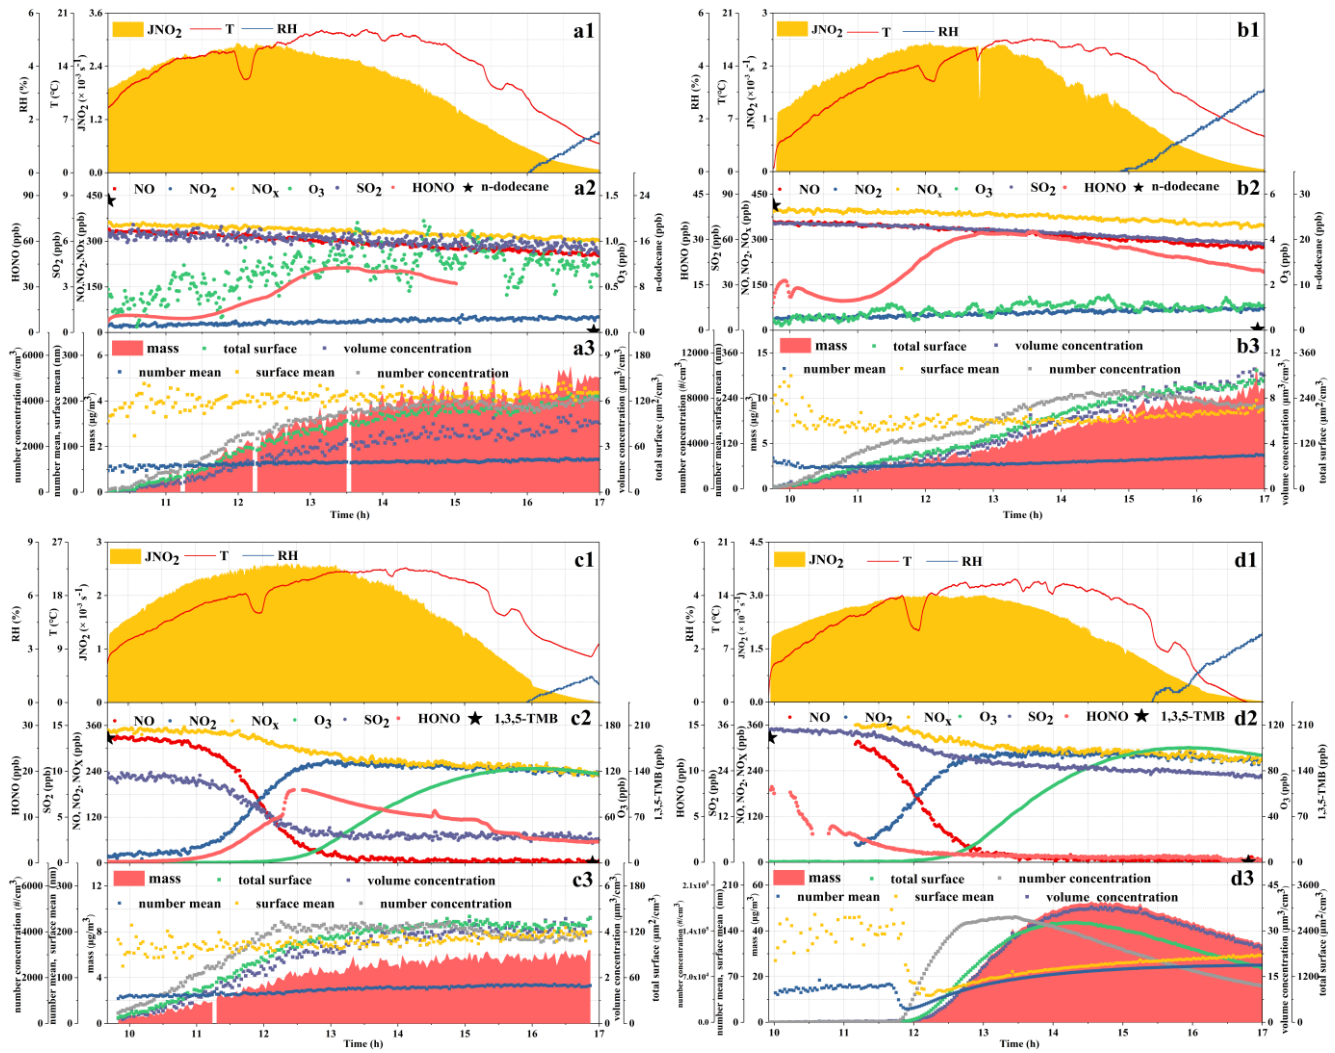



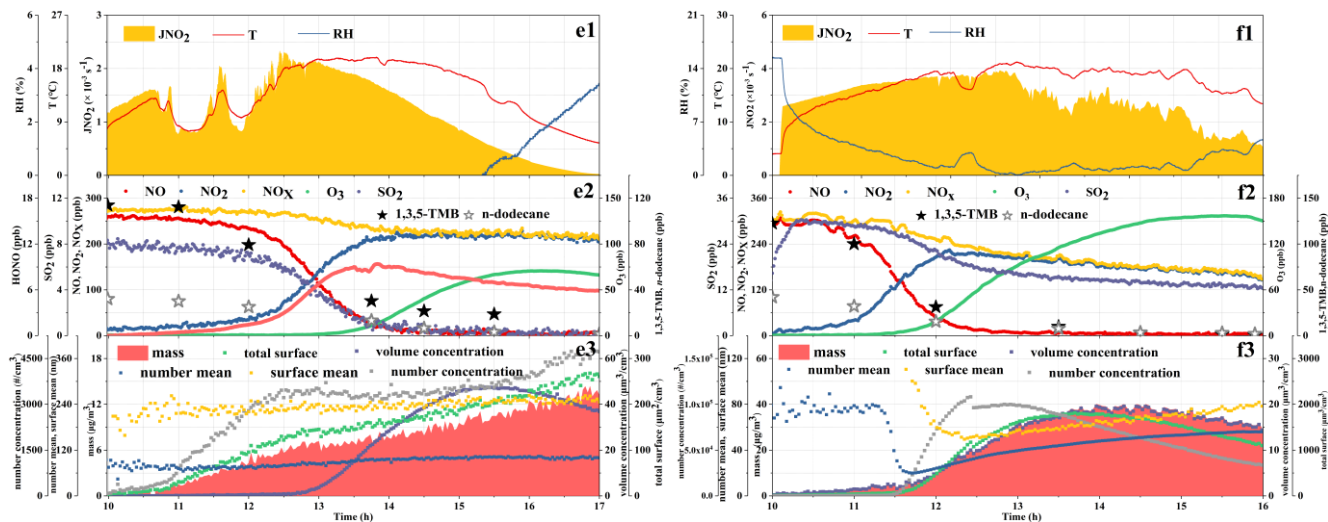

Figure S3. Reaction profiles of the NO experiments: (a) *n*-dodecane + NO + low concentration SO<sub>2</sub> (L-NO-Dod); (b) *n*-dodecane + NO + high concentration SO<sub>2</sub> (H-NO-Dod); (c) 1,3,5-trimethylbenzene + NO + low concentration SO<sub>2</sub> (L-NO-TMB); (d) 1,3,5-trimethylbenzene + NO + high concentration SO<sub>2</sub> (H-NO-TMB); (e) *n*-dodecane + 1,3,5-trimethylbenzene + NO + low concentration SO<sub>2</sub> (L-NO-Mix); (f) *n*-dodecane + 1,3,5-trimethylbenzene + NO + high concentration SO<sub>2</sub> (H-NO-Mix).

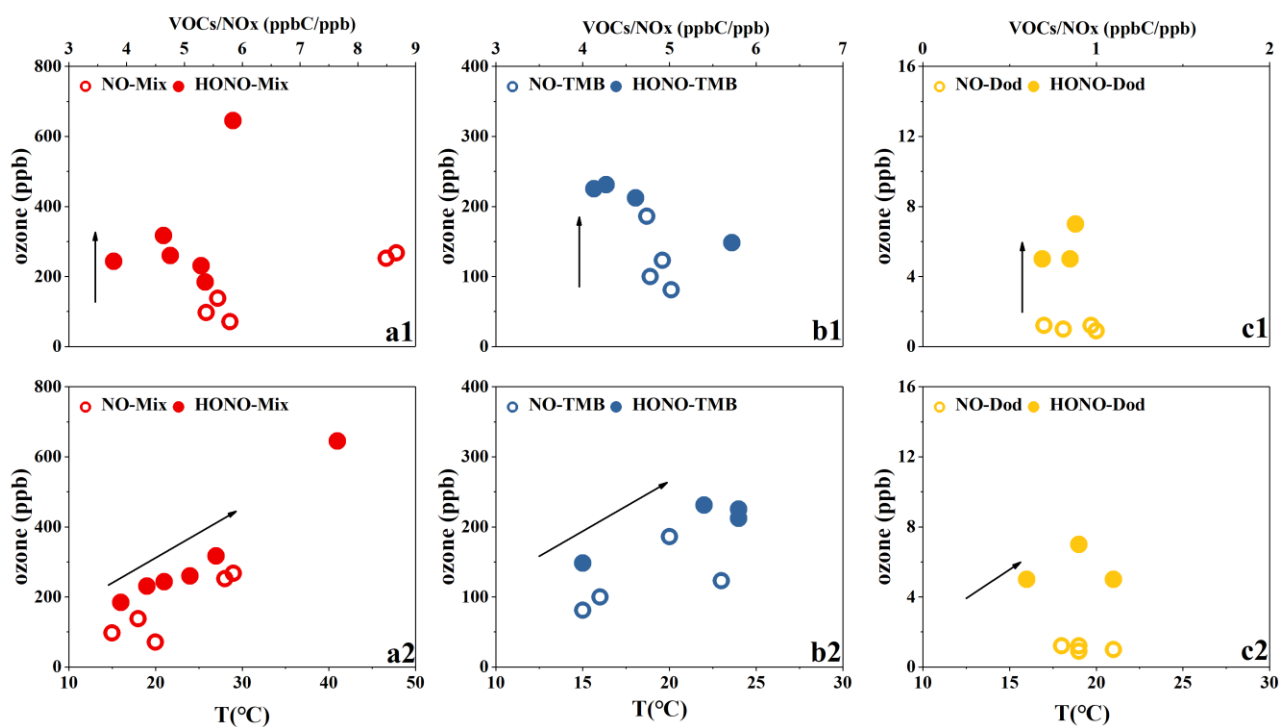

70 Figure S4. Ozone formation in the NO and HONO experiments. The temperature (T) and ozone concentration here refers to the maximum value during the reaction process.

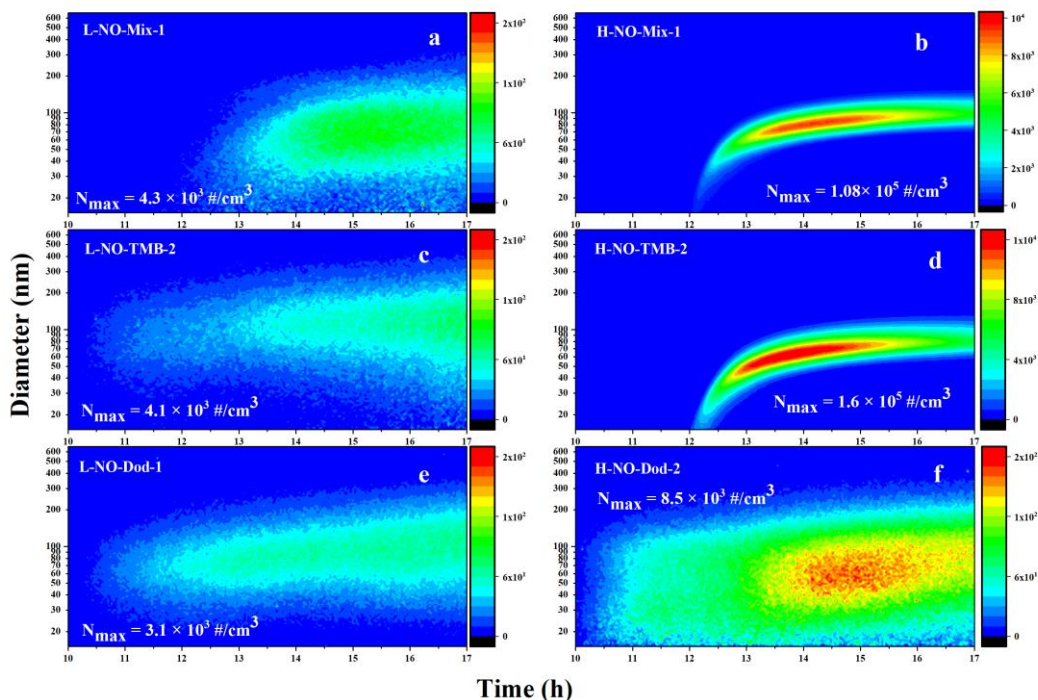

75 Figure S5. Number concentration of particles formed under NO conditions. (a) mixture-NO experiment with low  $SO_2$  concentration, L-NO-Mix; (b) mixture-NO experiment with high  $SO_2$  concentration, H-NO-Mix; (c) 1,3,5-TMB-NO experiment with low  $SO_2$  concentration, L-NO-TMB; (d) 1,3,5-TMB-NO experiment with high  $SO_2$  concentration, H-NO-TMB; (e) *n*-dodecane-NO experiment with low  $SO_2$  concentration, L-NO-Dod; (f) *n*-dodecane-NO experiment with high  $SO_2$  concentration, H-NO-Dod. The color bar in the figure is in the unit of  $\#/cm^3$ . See Table S1 for the experimental conditions.

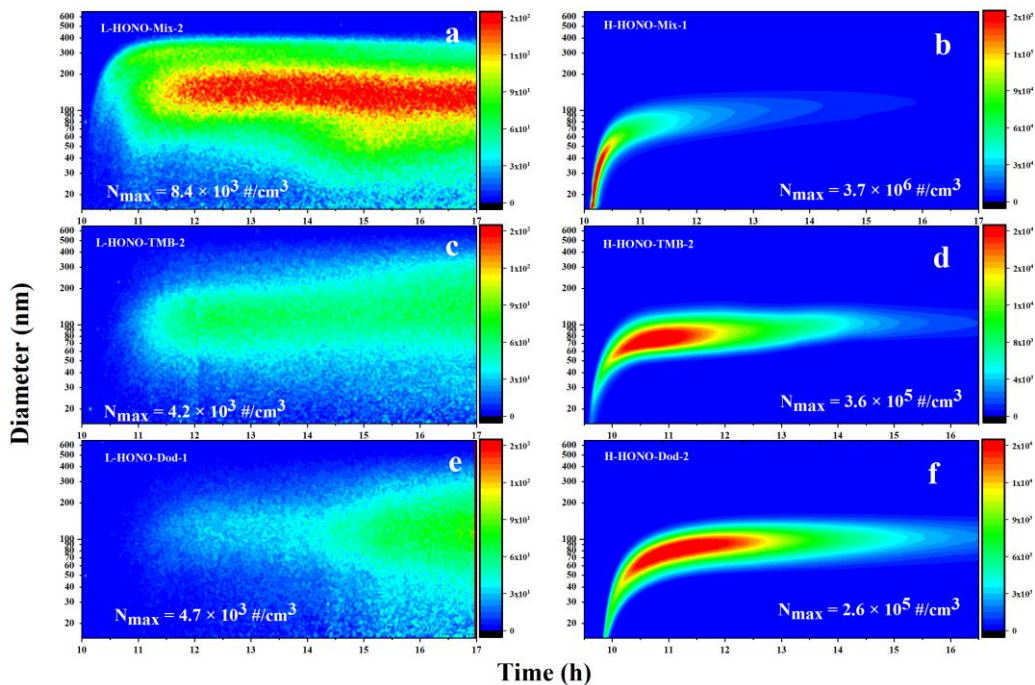

80 Figure S6. Number concentration of SA formed under HONO conditions. (a) mixture-HONO experiment with low  $SO_2$  concentration, L-HONO-Mix; (b) mixture-HONO experiment with high  $SO_2$  concentration, H-HONO-Mix; (c) 1,3,5-TMB-HONO experiment with low  $SO_2$  concentration, L-HONO-TMB; (d) 1,3,5-TMB-HONO experiment with high  $SO_2$  concentration, H-HONO-TMB; (e) *n*-dodecane-HONO experiment with low  $SO_2$  concentration, L-HONO-Dod; (f) *n*-dodecane-HONO experiment with high  $SO_2$  concentration, H-HONO-Dod. The color bar in the figure is in the unit of  $\#/cm^3$ . See Table S2 for the experimental conditions.

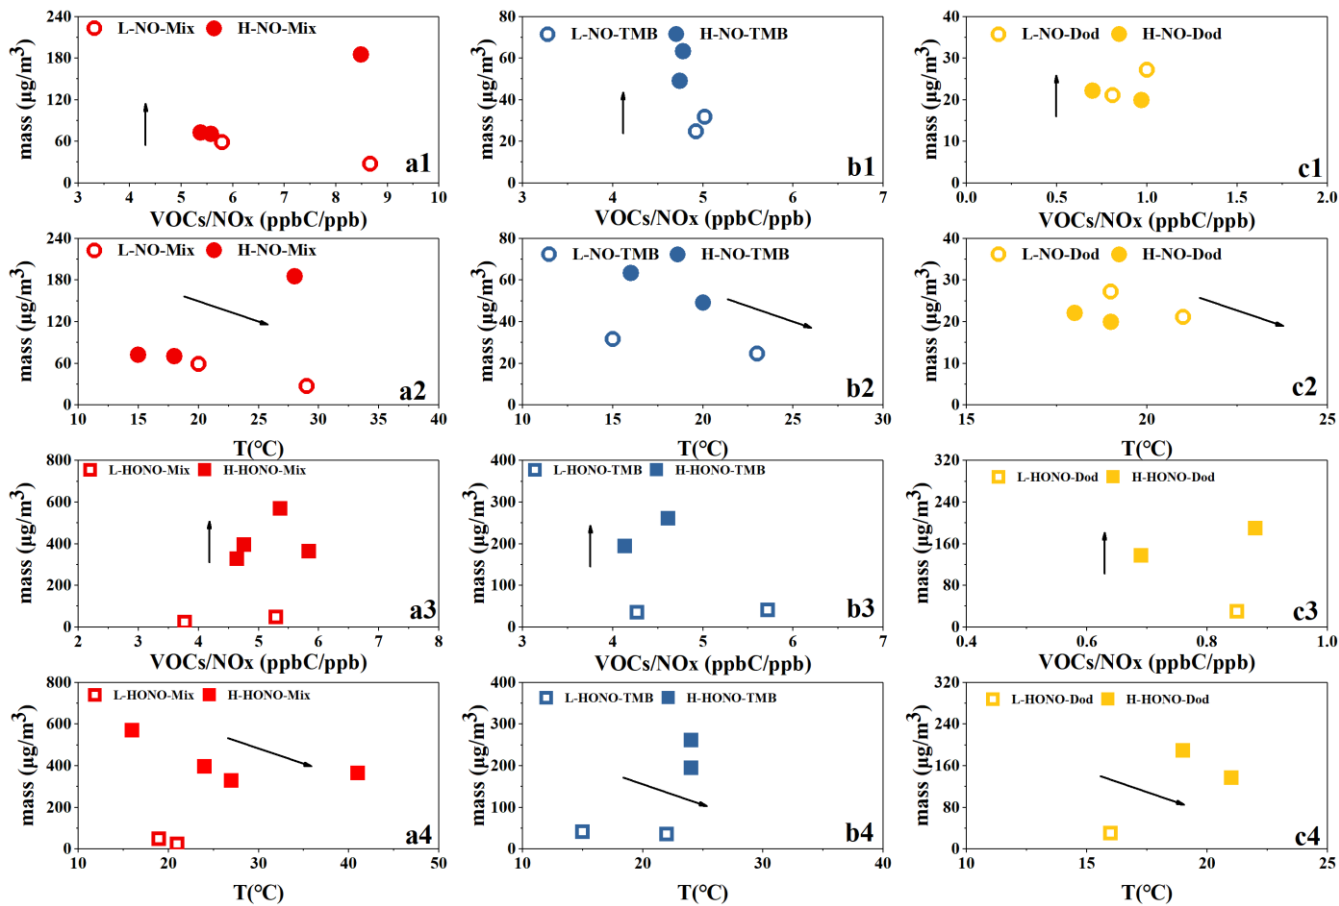

85

Figure S7. Particle formation of NO and HONO experiments. The temperature (T) and particle mass concentration here refers to the maximum value during the reaction process.

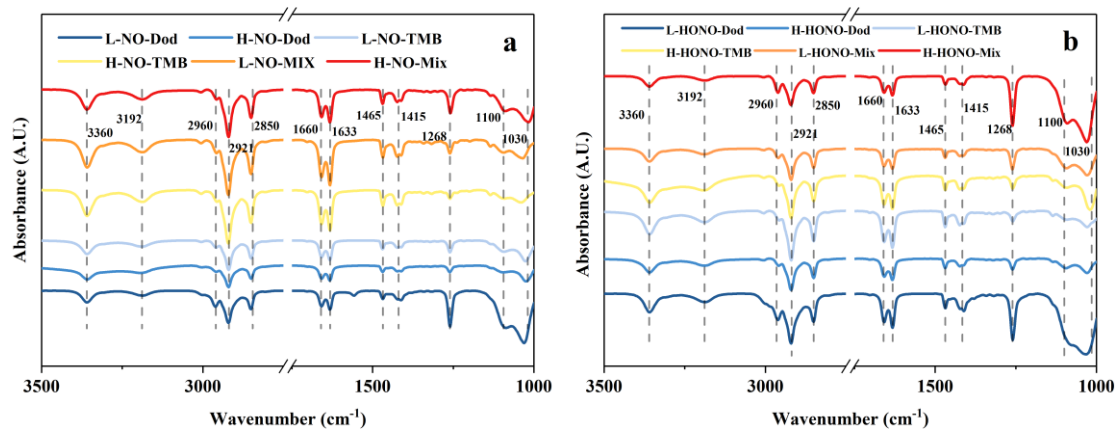

12

**Figure S8. Infrared spectra (IR) of aerosols under (a) NO conditions and (b) HONO conditions.**

90
